# Supplementary material for: Environmentally benign synthesis of branched Bi2O3–Bi2S3 photocatalysts by an etching and re-growth method
Source: Royal Society of Chemistry journal article supplement (doi:10.1039/c4ta05346j), 2014-11-12
Supplement: c4ta05346j1.pdf [file c4ta05346j1.pdf]

## Electronic Supplementary Information

### **Environment-benign synthesis of branched $\text{Bi}_2\text{O}_3\text{-Bi}_2\text{S}_3$ photocatalysts by an etching and re-growth method**

*Lang Chen, Jie He, Qing Yuan, Ying Liu, Chak-Tong Au, and Shuang-Feng Yin\**

State Key Laboratory of Chemo/Biosensing and Chemometrics, College of  
Chemistry and Chemical Engineering, Hunan University, Changsha 410082, Hunan,  
People's Republic of China

Corresponding author: Shuang-Feng Yin

Phone (Fax): 86-731-88821171

E-mail address: [sf\\_yin@hnu.edu.cn](mailto:sf_yin@hnu.edu.cn)

## Details for preparation, characterization and evaluation of the photocatalysts:

All reagents were commercially available and of analytical grade. They were used without further purification.

**Preparation of  $\text{Bi}_2\text{O}_3$ :** Typically, 10 mmol of  $\text{Bi}(\text{NO}_3)_3 \cdot 5\text{H}_2\text{O}$  was dissolved in 10 mL of nitric acid (1 mol/L). Then 47 mL of KOH (1 mol/L) was added to the above solution for pH adjustment, and there was the immediate formation of a white precipitant. Afterwards, the emulsion was transferred into a 100 mL Teflon-lined autoclave and maintained at 160 °C for different durations (i.e. 1, 3 or 6 h). After the autoclave was cooled down to room temperature,  $\text{Bi}_2\text{O}_3$  (hereinafter denoted as BO) in bright yellow was collected by filtration, and washed (de-ionized water and absolute ethanol) and dried at 80 °C for 4 h in air.

**Preparation of  $\text{Bi}_2\text{O}_3$ - $\text{Bi}_2\text{S}_3$  composites:** In this process, BO that acted both as substrate and bismuth source was hydrothermally treated with sulfide sources. Typically, 0.932 g (2 mmol) of the as-synthesized BO was dispersed in 100 mL sulfide-containing solutions (sodium sulfide, thiourea or potassium thiocyanate, denoted herein as SS, TU or PT, respectively). Then the mixture was hydrothermally treated at 160 °C for 6 h. The resulted  $\text{Bi}_2\text{O}_3$ - $\text{Bi}_2\text{S}_3$  composites (denoted as BO-BS) were collected by filtration, washed and dried as in the case of  $\text{Bi}_2\text{O}_3$  preparation.

**Characterization:** The as-prepared BO and BO-BS samples in the form of crystals were collected and characterized by powder X-ray diffraction (XRD) on a Bruker Automatic Diffractometer (Bruker D8 Advance) with monochromatized  $\text{CuK}\alpha$  radiation ( $\lambda=0.15406$  nm) at a setting of 40 kV and 80 mA. The scanning rate was  $0.02^\circ$  ( $2\theta$ )/s and the scanning range was  $10$ – $70^\circ$ . The FT-IR spectra were collected on a Perkin-Elmer IR spectrophotometer using the KBr pellet technique. The surface composition and chemical states of as-synthesized samples were measured by X-ray photoelectron spectroscopy (XPS). The amount of Bi, S and O were analyzed using an X-ray Fluorescence Spectrometer (AXIOS Advanced). Field emission scanning electron microscope (FE-SEM) (Hitachi S-4800) was employed to observe the micro- and nano-structure as well as the morphology of as-prepared samples. Transmission electron microscopy (TEM) and high-resolution transmission electron microscopy (HRTEM) images were taken over a JEM-3010F transmission electron microscope. UV-vis diffuse absorption spectra (UV-vis DRS) of samples were obtained over a UV-vis spectrophotometer (Cary 100) using  $\text{BaSO}_4$  as reference. Photoluminescence spectra (PL) of the samples were obtained using a Varian Cary Eclipse Fluorescence spectrophotometer (at 425 nm excitation). Transient photocurrent responses for the as-prepared samples under the irradiation of visible light (500 W Xe lamp with a cutoff filter) were recorded over an electrochemical analyzer (CHI660D Instruments) in a standard three-electrode system using the prepared samples as working electrode (ITO as supporter), Pt wire as counter electrode, and saturated calomel electrode (SCE) as reference.

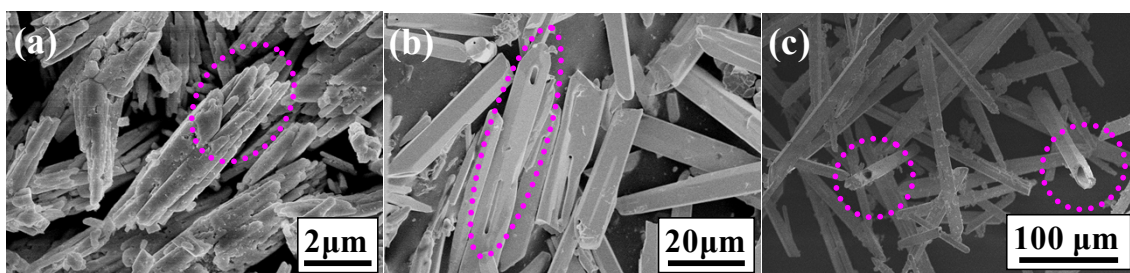

**Figure S1.** SEM images of  $\text{Bi}_2\text{O}_3$  after hydrothermal treatment: (a) 1 h, (b) 3 h, and (c) 6 h at 160 °C.

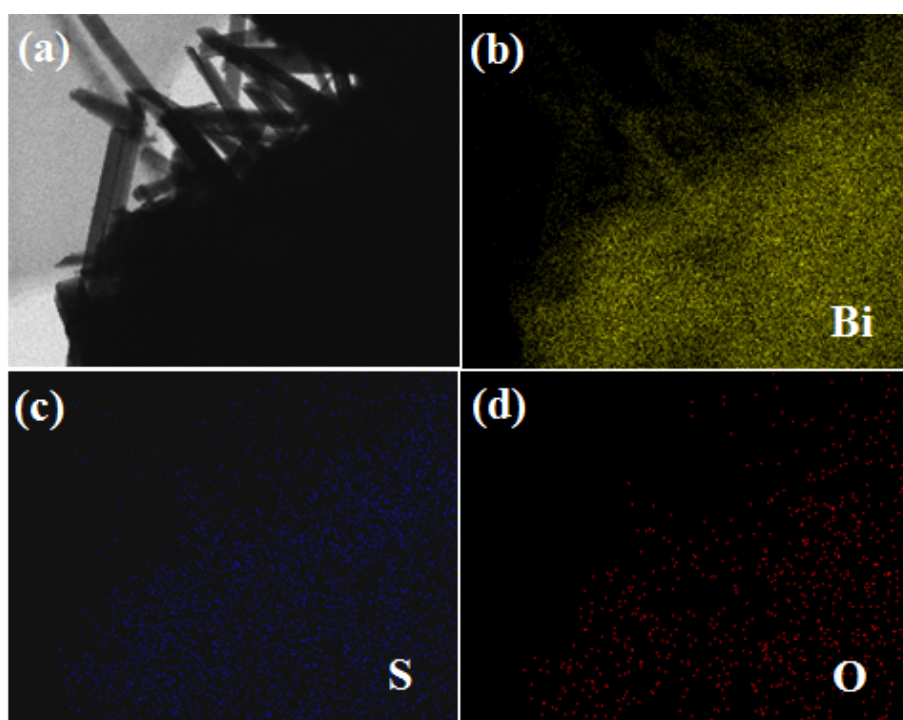

**Figure S2.** STEM images of (a) the  $\text{Bi}_2\text{O}_3$ - $\text{Bi}_2\text{S}_3$  composite, and the corresponding (b) Bi, (c) S, and (d) O elemental mappings.

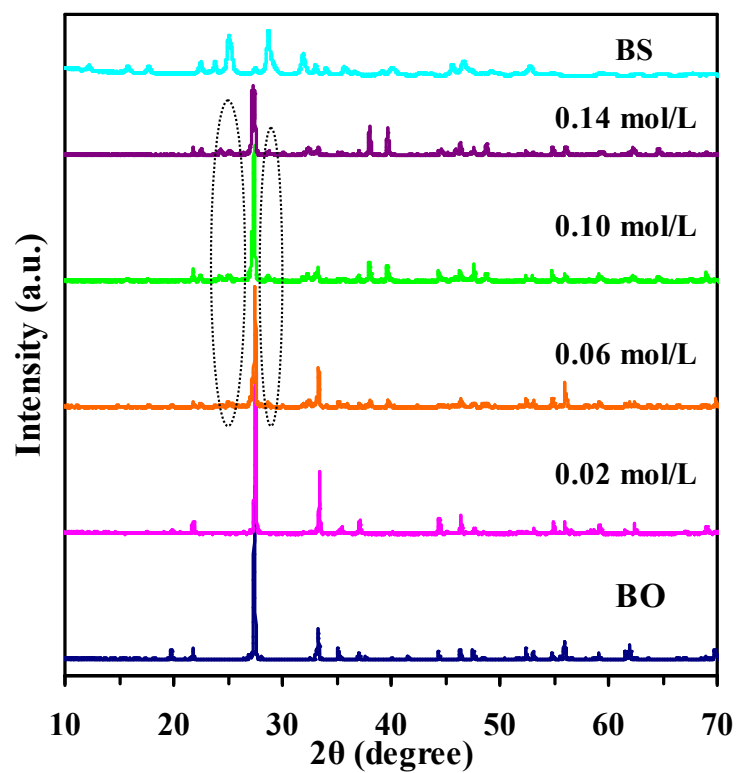

**Figure S3.** XRD patterns of BO ( $\text{Bi}_2\text{O}_3$ ), BS ( $\text{Bi}_2\text{S}_3$ ) and BO-BS ( $\text{Bi}_2\text{O}_3$ - $\text{Bi}_2\text{S}_3$ ) composites prepared using SS (sodium sulfide) sources of different concentrations.

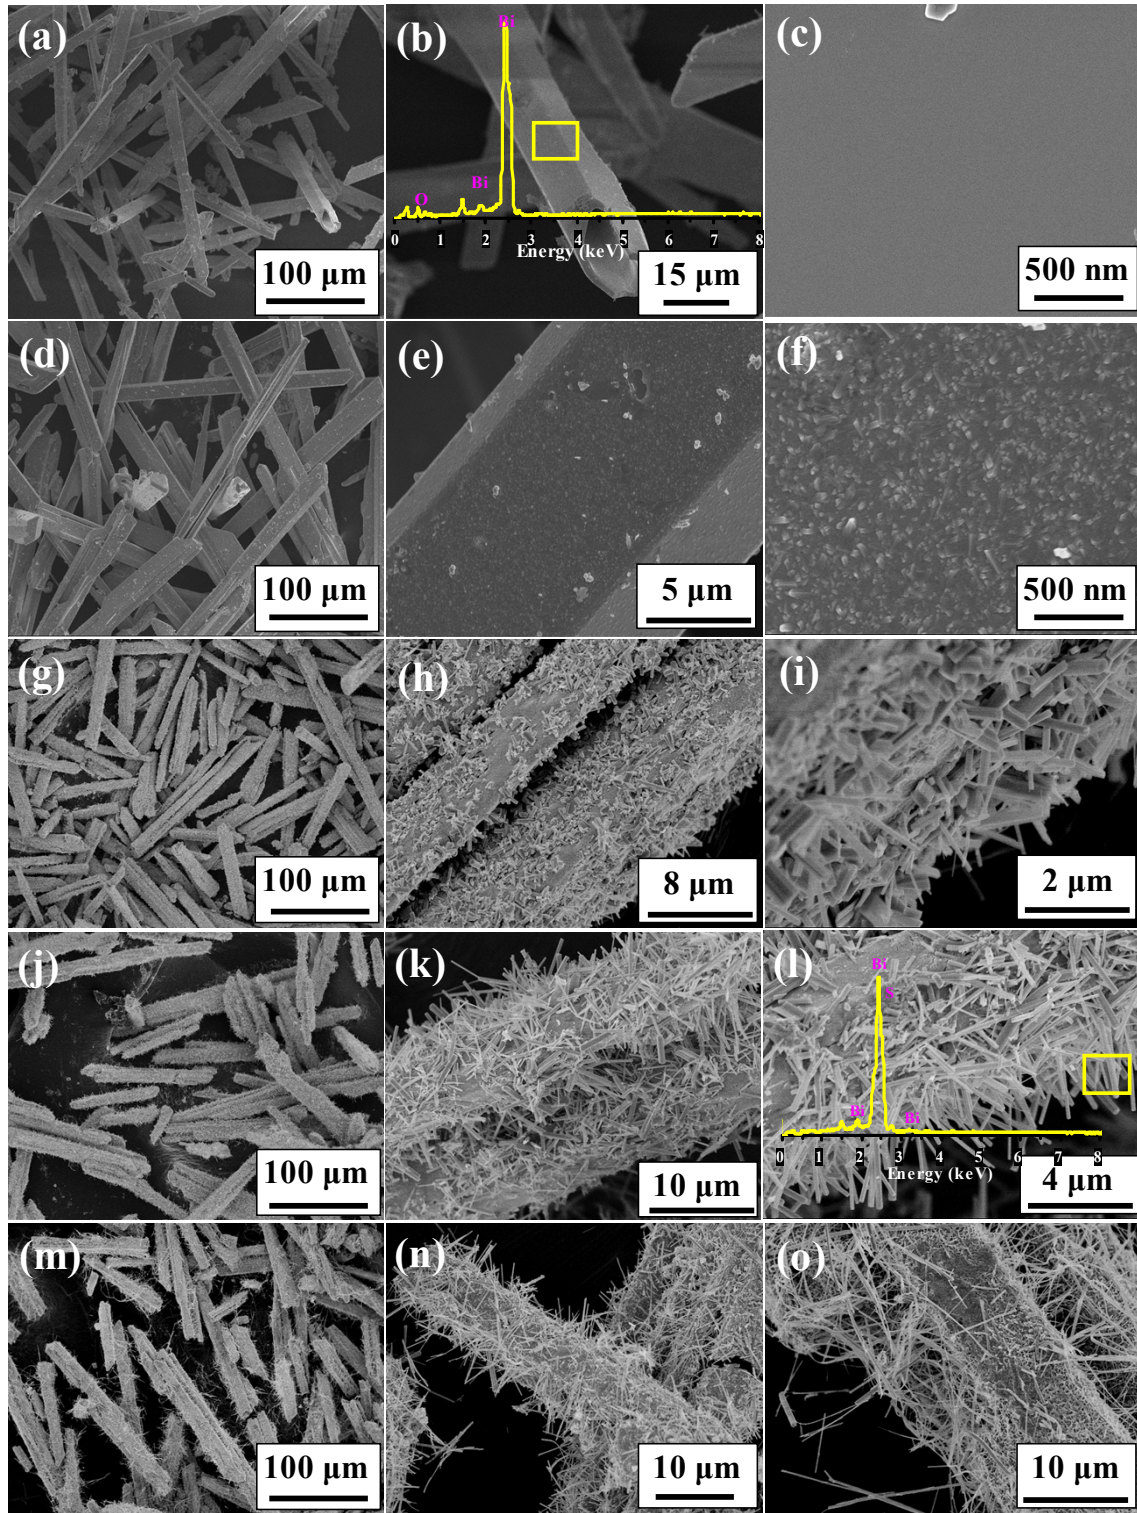

**Figure S4.** SEM images:  $\text{Bi}_2\text{O}_3$ , (a)-(c);  $\text{Bi}_2\text{O}_3\text{-Bi}_2\text{S}_3$  composites crystallized at different SS (sodium sulfide) concentrations for 6 h: (d)-(f) 0.02 mol/L; (g)-(i) 0.06 mol/L; (j)-(l) 0.10 mol/L and (m)-(o) 0.14 mol/L.

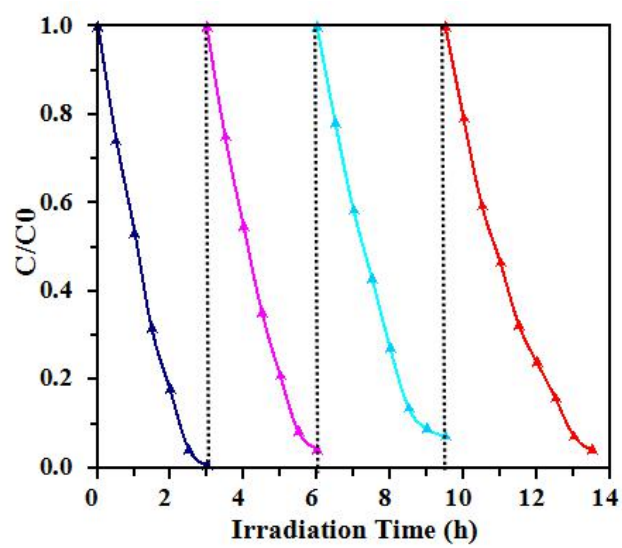

**Figure S5.** Recycling behavior of the  $\text{Bi}_2\text{O}_3\text{-Bi}_2\text{S}_3$  composite (using thiourea as sulfur sources).
